# Supplementary material
Source: PubMed Central journal article supplement (PMC5033950)
Supplement: jciinsight-1-86380-s001.pdf [file jciinsight-1-86380-s001.pdf]

1 Supplementary information

2

# 3 Fibulin-1 regulates the pathogenesis of tissue 4 remodeling in respiratory diseases

5

6 Gang Liu,<sup>1</sup> Marion A. Cooley,<sup>2</sup> Andrew G. Jarnicki,<sup>1</sup> Alan C-Y. Hsu,<sup>1</sup> Prema M.  
7 Nair,<sup>1</sup> Tatt Jhong Haw,<sup>1</sup> Michael Fricker,<sup>1</sup> Shaan L. Gellatly,<sup>1</sup> Richard Y. Kim,<sup>1</sup>  
8 Mark D. Inman,<sup>3</sup> Gavin Tjin,<sup>4</sup> Peter A B. Wark,<sup>1,5</sup> Marjorie M. Walker,<sup>1</sup> Jay C.  
9 Horvat,<sup>1</sup> Brian G. Oliver,<sup>4,6</sup> W. Scott Argraves,<sup>2</sup> Darryl A. Knight,<sup>1,7</sup> Janette K.  
10 Burgess,<sup>4,8,9</sup> and Philip M. Hansbro<sup>1</sup>

11

12 <sup>1</sup>Priority Research for Asthma and Respiratory Diseases, Hunter Medical  
13 Research Institute and The University of Newcastle, Newcastle, New South  
14 Wales 2305, Australia

15 <sup>2</sup>Department of Regenerative Medicine and Cell Biology, Medical University of  
16 South Carolina, Charleston, South Carolina 29425, USA

17 <sup>3</sup>Division of Respiriology, Department of Medicine, McMaster University,  
18 Hamilton, Ontario L8S 4K1, Canada

19 <sup>4</sup>Woolcock Institute of Medical Research, Discipline of Pharmacology, The  
20 University of Sydney, Sydney, New South Wales 2006, Australia

21 <sup>5</sup>Department of Respiratory and Sleep Medicine, John Hunter Hospital,  
22 Newcastle, New South Wales 2305, Australia

23 <sup>6</sup>School of Life Sciences, The University of Technology, Sydney, New South  
24 Wales 2007, Australia

25 <sup>7</sup>Department of Anesthesiology, Pharmacology and Therapeutics, University  
26 of British Columbia, Vancouver, British Columbia V6T 1Z3, Canada

27 <sup>8</sup>Discipline of Pharmacology, Sydney Medical School, The University of  
28 Sydney, New South Wales 2042, Australia

29 <sup>9</sup>Department Pathology and Medical Biology, University of Groningen,  
30 University Medical Center, Groningen 9713GZ, The Netherlands

31

32 **Address correspondence to:** Philip M. Hansbro, Hunter Medical Research  
33 Institute and The University of Newcastle, 1 Kookaburra Circuit, New Lambton  
34 Heights, New South Wales, 2305, Australia. Phone: 61.2.4042.0187; Fax  
35 61.2.4042.0024; E-mail [Philip.Hansbro@newcastle.edu.au](mailto:Philip.Hansbro@newcastle.edu.au).

36

37 **Authorship note:** G. Liu, M.A. Cooley and A.G. Jarnicki contributed equally  
38 to this work.

39

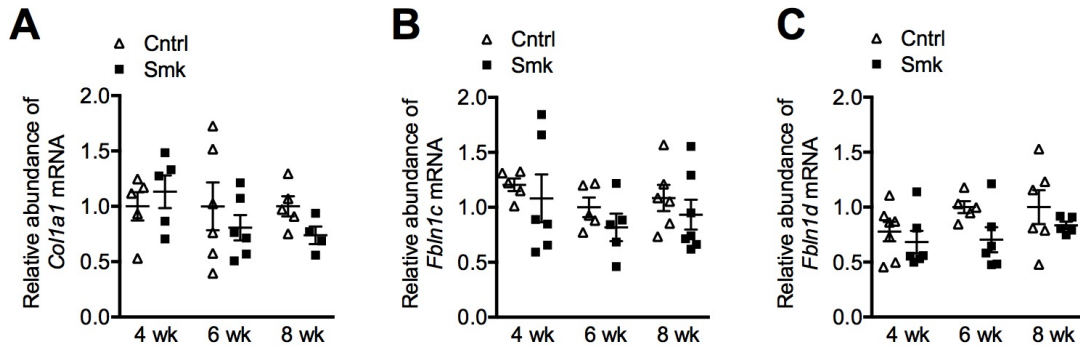

40  
41  
42  
43  
44  
45  
46  
47

**Supplementary Figure 1. *Col1a1*, *Fbln1c* and *Fbln1d* mRNA levels in cigarette smoke (CS)-induced experimental COPD.** WT mice were exposed to CS for eight-weeks to induce experimental COPD, controls were exposed to normal air. Relative abundance of *Col1a1* (A), *Fbln1c* (B), and *Fbln1d* (C) mRNA levels in whole lungs after four-, six-, and eight-weeks of CS-exposure, determined by qPCR, n=5-6. Results are mean  $\pm$  SEM. Statistical differences were determined with one-way ANOVA followed by Bonferroni post-test.

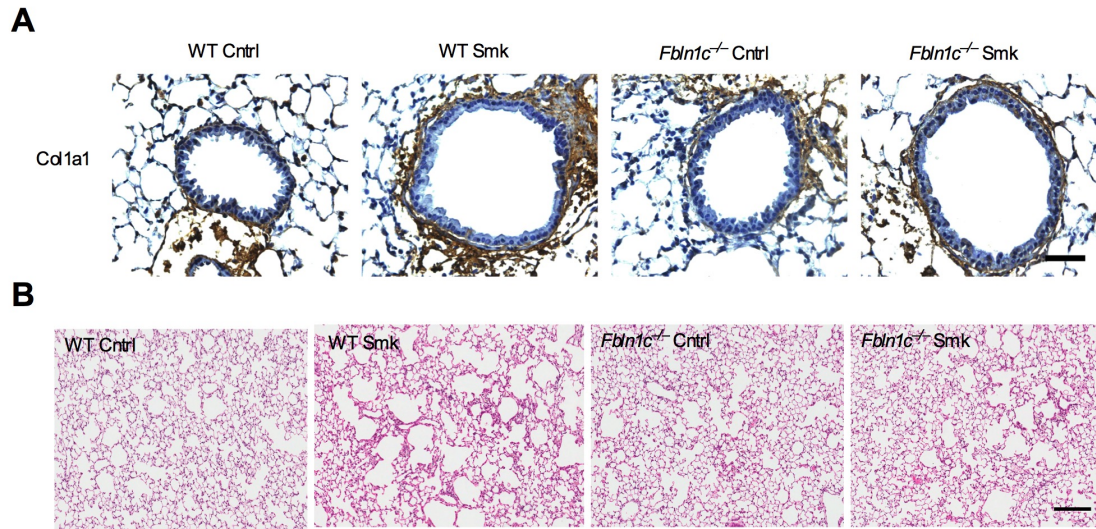

48  
49  
50  
51  
52  
53  
54  
55

**Supplementary Figure 2. Absence of *Fbln1c* protects against Col1a1 deposition around small airways and emphysema in experimental COPD.** WT and *Fbln1c* deficient (<sup>-/-</sup>) mice were exposed to cigarette smoke for eight-weeks to induce experimental COPD, controls were exposed to normal air. **(A)** Col1a1 around mouse small airways (scale bar, 50 μm) assessed by immunohistochemistry. **(B)** Lung sections stained with hematoxylin and eosin (scale bar, 200 μm). n=5-6 mice per group.

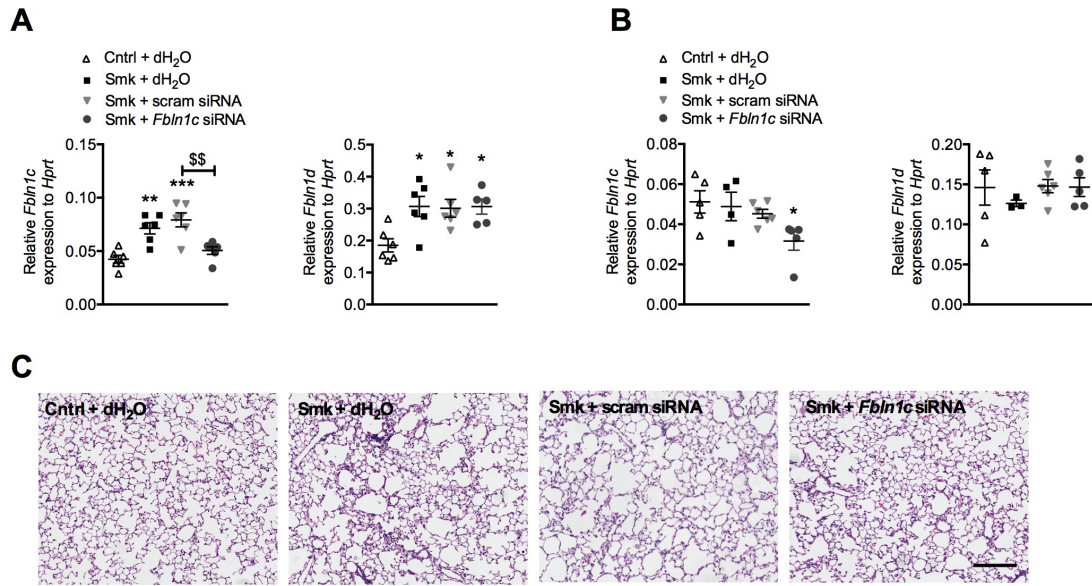

56  
 57  
 58  
 59  
 60  
 61  
 62  
 63  
 64  
 65  
 66  
 67  
 68

**Supplementary Figure 3. *Fbln1c* siRNA reduces target mRNA expression in lungs and protects against emphysema in experimental COPD.** WT mice were exposed to cigarette smoke (CS) for four-days or eight-weeks to induce experimental COPD and were treated with *Fbln1c* or scrambled siRNA. (A) *Fbln1c* and *Fbln1d* mRNA levels after siRNA treatment every two-days during four-days of CS-exposure, n=5-6. (B) *Fbln1c* and *Fbln1d* mRNA levels after siRNA treatment from weeks 6-8 of eight-weeks of CS-exposure, n=5-6. (C) Lung sections stained with hematoxylin and eosin (scale bar, 200  $\mu$ m). Results are mean  $\pm$  SEM. \*P<0.05, \*\*P<0.01, \*\*\*P<0.001 compared to normal air-exposed WT controls. \$\$\$P<0.01 compared to CS-exposed controls treated with scrambled siRNA. Statistical differences were determined with one-way ANOVA followed by Bonferroni post-test.

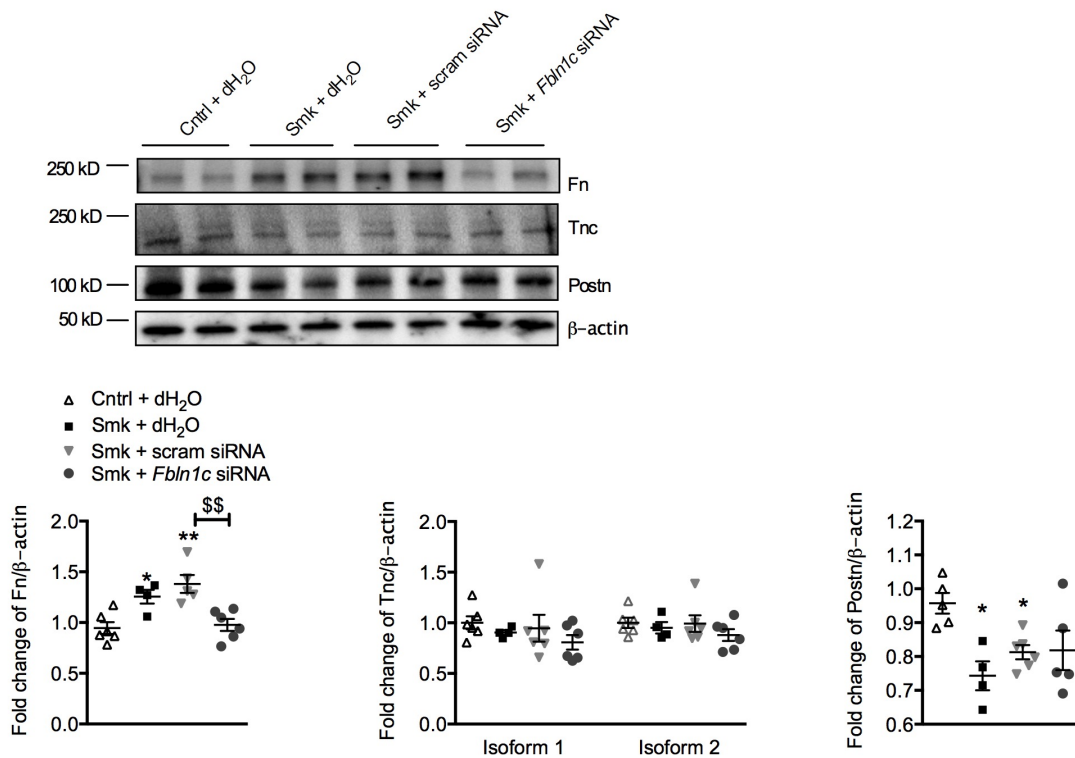

69  
70  
71  
72  
73  
74  
75  
76  
77  
78  
79

**Supplementary Figure 4. *Fbln1c* siRNA alters *Fbln1c* binding proteins in whole lungs in experimental COPD.** WT mice were exposed to cigarette smoke (CS) for eight-weeks to induce experimental COPD and were treated with *Fbln1c* or scrambled siRNA from weeks 6-8 of eight-weeks CS exposure. Fibronectin (Fn), tenascin-c (Tnc) and periostin (Postn) protein levels in whole lungs assessed by immunoblot (top), and fold change of protein densitometry normalized to β-actin (bottom, n=5-6). Results are mean ± SEM. \*P<0.05, \*\*P<0.01 compared to normal air-exposed WT controls. \$\$P<0.01 compared to CS-exposed controls treated with scrambled siRNA. Statistical differences were determined with one-way ANOVA followed by Bonferroni post-test.

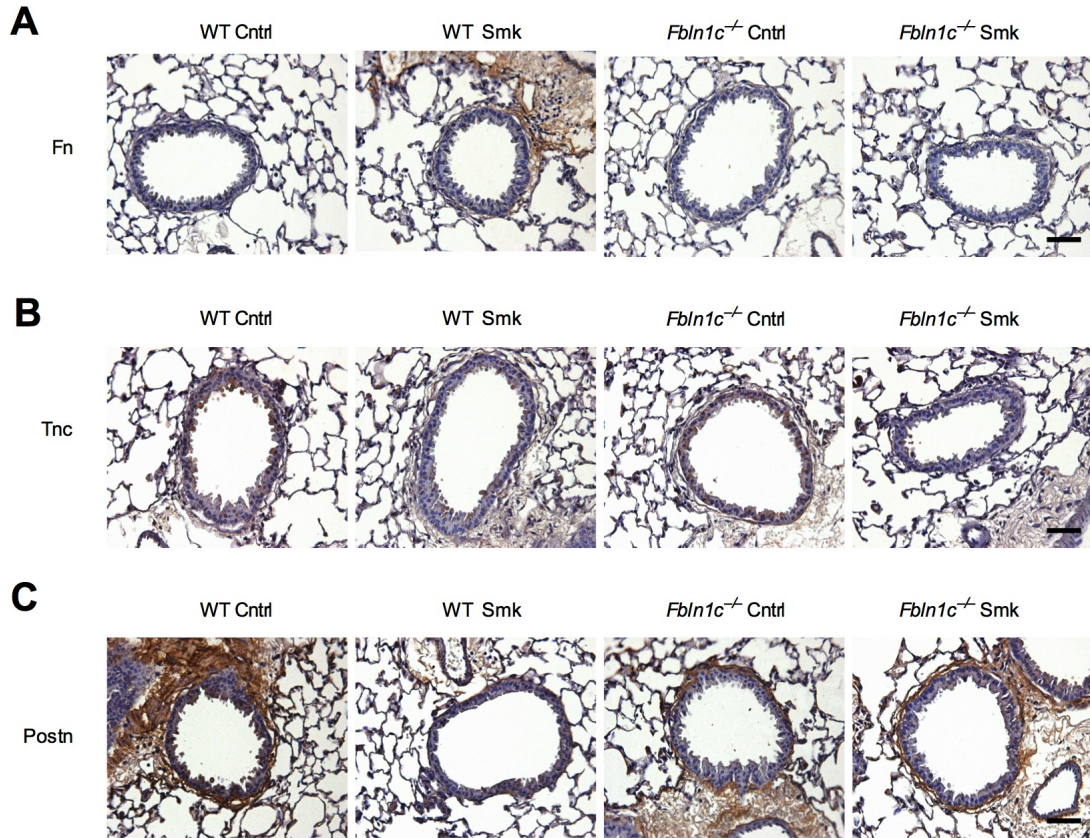

80  
81  
82  
83  
84  
85  
86  
87  
88

**Supplementary Figure 5. *Fbln1c* binding proteins are altered in whole lungs and around small airways in WT and *Fbln1c*<sup>-/-</sup> mice with experimental COPD.** WT and *Fbln1c*<sup>-/-</sup> mice were exposed to cigarette smoke for eight-weeks to induce experimental COPD, controls were exposed to normal air. **(A)** Fibronectin (Fn), **(B)** tenascin-c (Tnc) and **(C)** periostin (Postn) around mouse small airways by immunohistochemistry (scale bar, 50  $\mu$ m). n=5-6 mice per group.

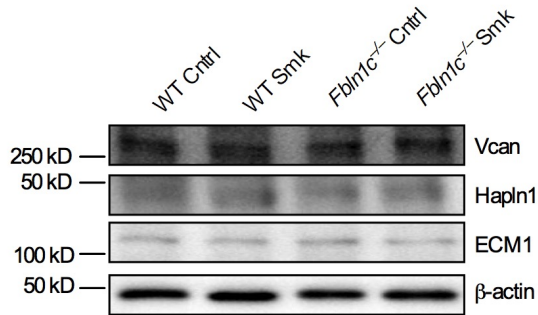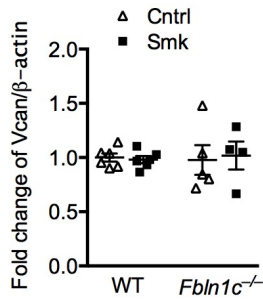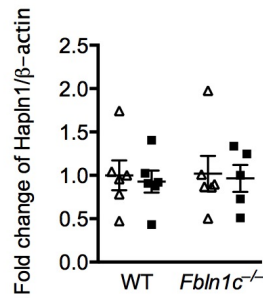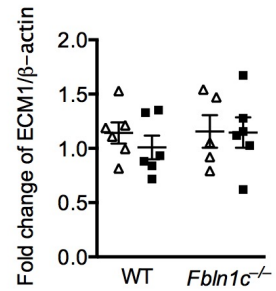

89  
90  
91  
92  
93  
94  
95  
96  
97  
98  
99

**Supplementary Figure 6. Irrespective of the presence or absence of *Fbln1c* other ECM proteins are not altered in experimental COPD.** WT and *Fbln1c* deficient (<sup>-/-</sup>) mice were exposed to cigarette smoke for eight-weeks to induce experimental COPD, controls were exposed to normal air. Versican (Vcan), hyaluronan and proteoglycan link protein (Hapln1), and extracellular matrix protein 1 (ECM1) proteins level in whole lungs by immunoblot (top), and fold change of protein densitometry normalized to  $\beta$ -actin (bottom), n=5-6. Results are mean  $\pm$  SEM. Statistical differences were determined with one-way ANOVA followed by Bonferroni post-test.



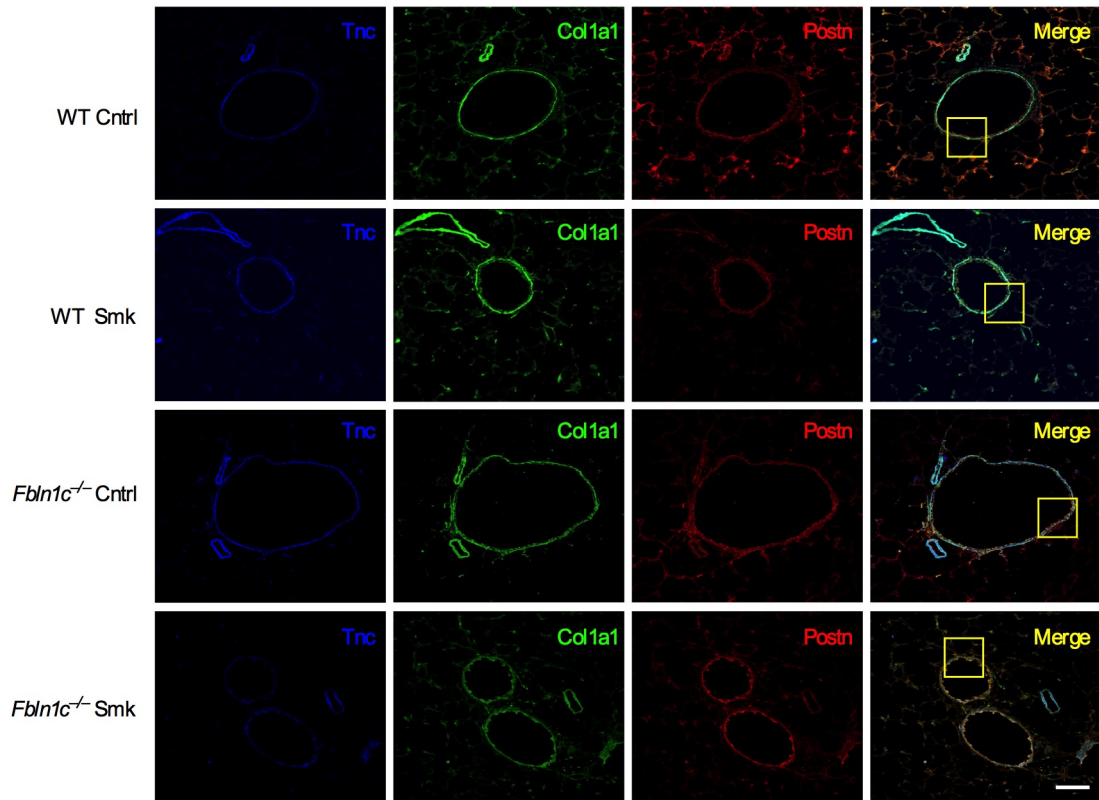

100  
 101  
 102  
 103  
 104  
 105  
 106  
 107  
 108

**Supplementary Figure 7. Tenascin-c (Tnc), type I collagen- $\alpha$ 1 (Col1a1), and periostin (Postn) co-localize around mouse small airways in experimental COPD.** Wild type (WT) and *Fbln1c* deficient ( $^{-/-}$ ) mice were exposed to cigarette smoke for eight-weeks to induce experimental COPD, controls were exposed to normal air. Co-localization of Tnc (blue), Col1a1 (green) and Postn (red) around mouse small airways (scale bar, 50  $\mu$ m, area magnified in Figure 4E is boxed). n=3.

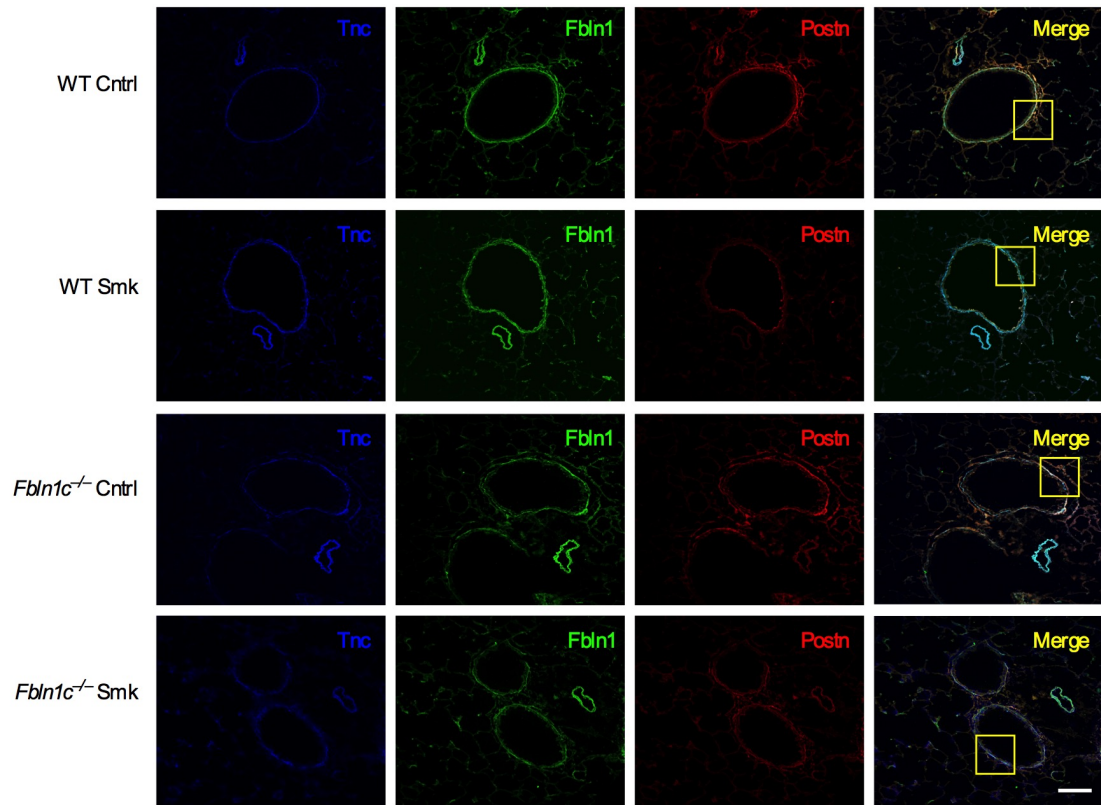

109  
 110  
 111  
 112  
 113  
 114  
 115  
 116  
 117

**Supplementary Figure 8. Tenascin-c (Tnc), fibulin-1 (Fbln1), and periostin (Postn) co-localize around mouse small airways in experimental COPD.** WT and *Fbln1c* deficient ( $^{-/-}$ ) mice were exposed to cigarette smoke for eight-weeks to induce experimental COPD, controls were exposed to normal air. Co-localization of Tnc (blue), Fbln1 (green) and Postn (red) around mouse small airways (scale bar, 50  $\mu$ m, area magnified in Figure 4F is boxed). n=3.

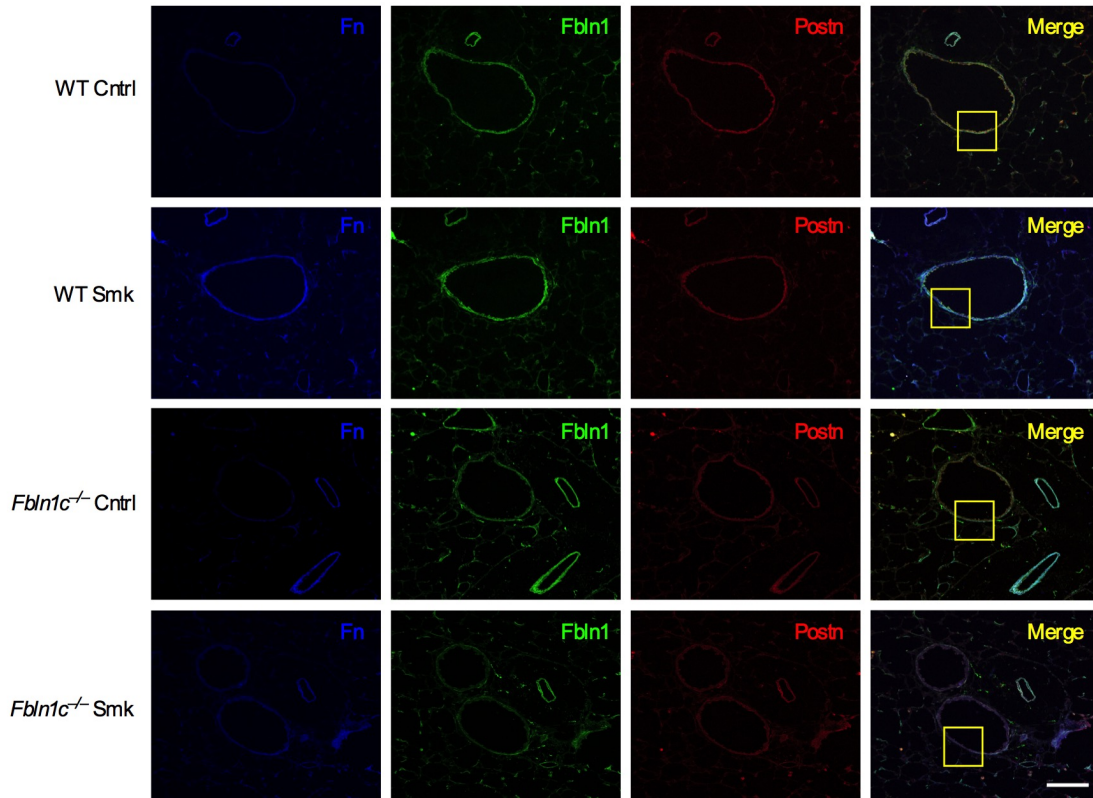

118  
 119  
 120  
 121  
 122  
 123  
 124  
 125  
 126

**Supplementary Figure 9. Fibronectin (Fn), fibulin-1 (Fbln1), and periostin (Postn) co-localized around mouse small airways in experimental COPD.** WT and *Fbln1c* deficient ( $-/-$ ) mice were exposed to cigarette smoke for eight-weeks to induce experimental COPD, controls were exposed to normal air. Co-localization of Fn (blue), Postn (red) and Fbln1 (green) around mouse small airways (scale bar, 50  $\mu$ m, area magnified in Figure 4E is boxed). n=3.

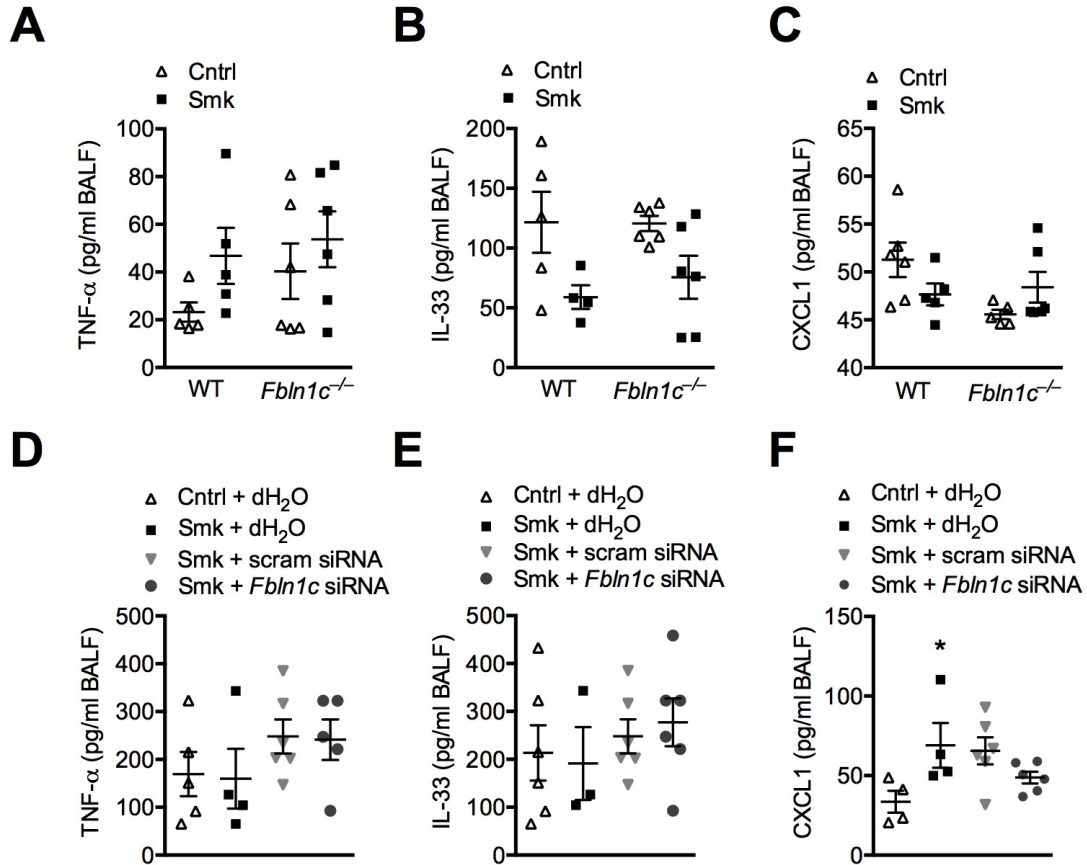

127  
128  
129  
130  
131  
132  
133  
134  
135  
136  
137  
138

**Supplementary Figure 10. Cytokine and chemokine changes in the airways in BALF in experimental COPD.** WT and *Fbln1c* deficient (<sup>-/-</sup>) mice were exposed to cigarette smoke (CS) for eight-weeks to induce experimental COPD, controls were exposed to normal air. **(A)** TNF- $\alpha$ , **(B)** IL-33, and **(C)** CXCL1 proteins in bronchoalveolar lavage fluid (BALF) were measured by ELISA. WT mice were exposed to CS for eight-weeks to induce experimental COPD and were treated with *Fbln1c* or scrambled siRNA from weeks 6-8 of eight-weeks of CS exposure. **(D)** TNF- $\alpha$ , **(E)** IL-33 and **(F)** CXCL1 protein in BALF were measured by ELISA. n=5-6. Results are mean  $\pm$  SEM. \*P<0.05 compared to air-exposed WT controls. Statistical differences were determined with one-way ANOVA followed by Bonferroni post-test.

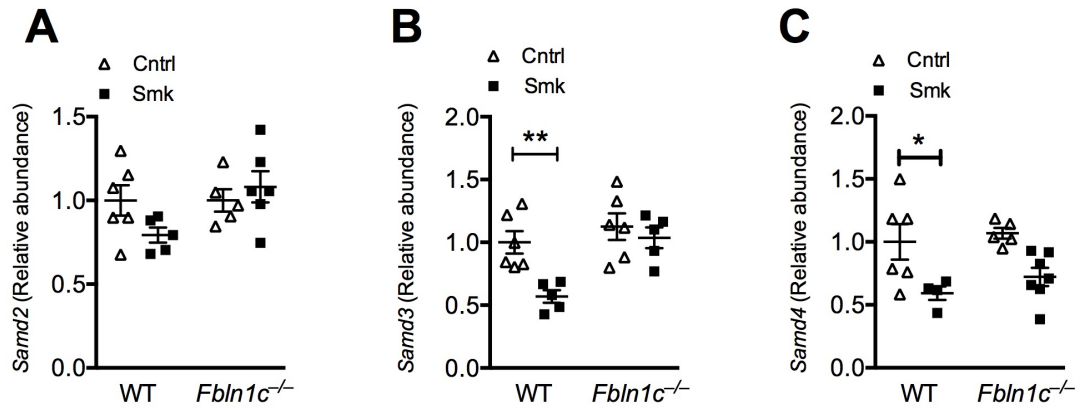

139  
140  
141  
142  
143  
144  
145  
146  
147

**Supplementary Figure 11.** Absence of *Fbln1c* prevents reductions in *Smad3* and *Smad4* mRNA in the lungs in experimental COPD. WT and *Fbln* deficient (<sup>-/-</sup>) mice were exposed to cigarette smoke (CS) for eight-weeks to induce experimental COPD, controls were exposed to normal air. (A) *Smad2*, (B) *Smad3*, and (C) *Smad4* mRNA levels in whole lungs determined by qPCR, n=5-6. Results are mean ± SEM. \*P<0.05, \*\*P<0.01 compared to WT controls. Statistical differences were determined with one-way ANOVA followed by Bonferroni post-test.

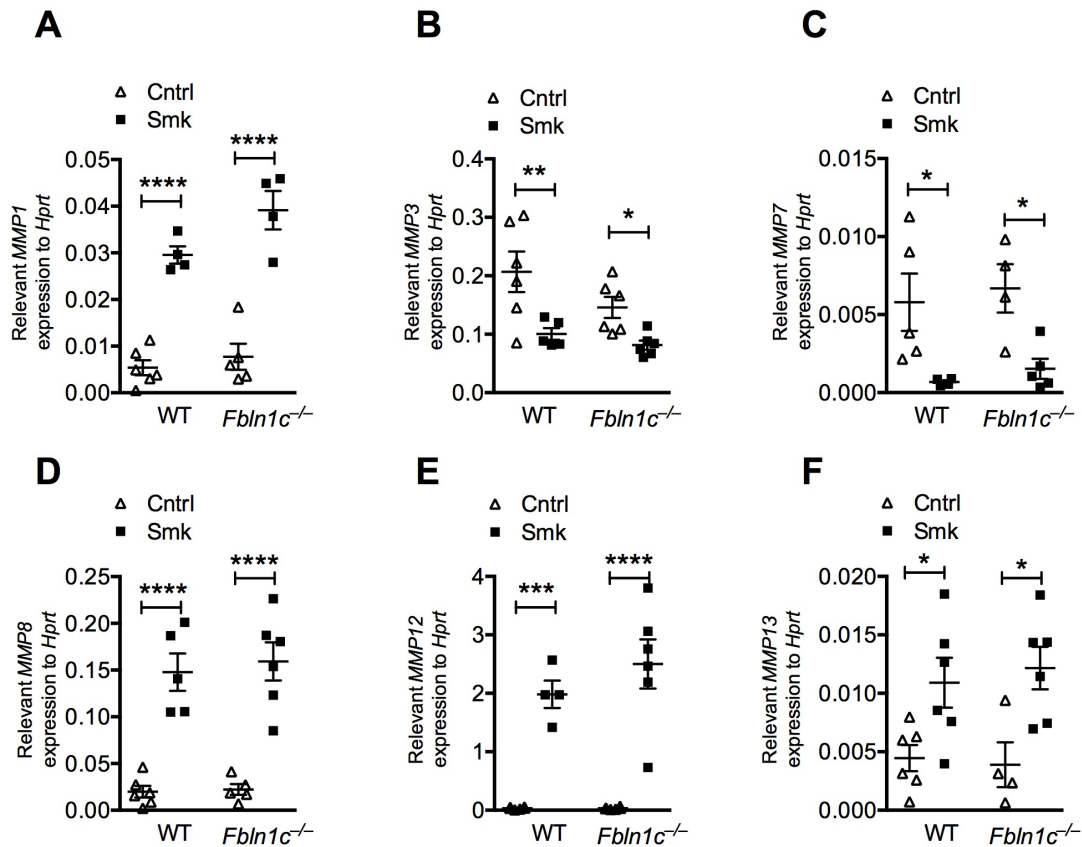

148  
149  
150  
151  
152  
153  
154  
155  
156

**Supplementary Figure 12.** MMP mRNA levels in the lungs in experimental COPD. WT and *Fbln* deficient (<sup>-/-</sup>) mice were exposed to cigarette smoke (CS) for eight-weeks to induce experimental COPD, controls were exposed to normal air. **(A)** *MMP1*, **(B)** *MMP3*, **(C)** *MMP7*, **(D)** *MMP8*, **(E)** *MMP12*, and **(F)** *MMP13* mRNA levels in whole lungs determined by qPCR, n=5-6. Results are mean ± SEM. \*P<0.05, \*\*P<0.01, \*\*\*P<0.001, \*\*\*\*P<0.0001 compared to normal air-exposed WT or *Fbln1c*<sup>-/-</sup> controls. Statistical differences were determined with one-way ANOVA followed by Bonferroni post-test.

157  
158  
159  
160  
161  
162

**Supplementary Table 1. Extracellular matrix (ECM) protein gene expression in whole lungs in experimental COPD.** WT mice were exposed to cigarette smoke for eight-weeks to induce experimental COPD, controls were exposed to normal air. ECM protein gene expression in the lungs was assessed by PCR array. Red = up-regulated >2-fold, blue = down-regulated >2-fold.

| Symbol  | Gene                                                                                          | 4wk (Smk vs Cntrl) | 8wk (Smk vs Cntrl) |
|---------|-----------------------------------------------------------------------------------------------|--------------------|--------------------|
|         | Description                                                                                   | Fold change        | Fold change        |
| Adams1  | A disintegrin-like and metallopeptidase (reprolysin type) with thrombospondin type 1 motif, 1 | -1.3824            | -1.894             |
| Adams2  | A disintegrin-like and metallopeptidase (reprolysin type) with thrombospondin type 1 motif, 2 | -2.4338            | -2.2306            |
| Adams5  | A disintegrin-like and metallopeptidase (reprolysin type) with thrombospondin type 1 motif, 5 | -1.2494            | -1.9284            |
| Adams8  | A disintegrin-like and metallopeptidase (reprolysin type) with thrombospondin type 1 motif, 8 | -1.4552            | -1.2856            |
| Cd44    | CD44 antigen                                                                                  | -1.0397            | 1.5153             |
| Cdh1    | Cadherin 1                                                                                    | -1.4562            | -1.4503            |
| Cdh2    | Cadherin 2                                                                                    | -1.182             | -1.2332            |
| Cdh3    | Cadherin 3                                                                                    | -6.4183            | -1.7248            |
| Cdh4    | Cadherin 4                                                                                    | 1.3926             | -1.01              |
| Cntn1   | Contactin 1                                                                                   | -1.0426            | -1.3008            |
| Col1a1  | Collagen, type I, alpha 1                                                                     | -2.5039            | -1.3513            |
| Col2a1  | Collagen, type II, alpha 1                                                                    | -3.6558            | -1.2171            |
| Col3a1  | Collagen, type III, alpha 1                                                                   | -1.6739            | -1.9391            |
| Col4a1  | Collagen, type IV, alpha 1                                                                    | -1.618             | -2.1146            |
| Col4a2  | Collagen, type IV, alpha 2                                                                    | -1.7401            | -1.6238            |
| Col4a3  | Collagen, type IV, alpha 3                                                                    | -1.034             | -1.2972            |
| Col5a1  | Collagen, type V, alpha 1                                                                     | -1.2076            | -2.5305            |
| Col6a1  | Collagen, type VI, alpha 1                                                                    | -1.7114            | -1.5642            |
| Ctgf    | Connective tissue growth factor                                                               | 1.2199             | -1.05              |
| Ctnna1  | Catenin (cadherin associated protein), alpha 1                                                | -1.096             | -1.4403            |
| Ctnna2  | Catenin (cadherin associated protein), alpha 2                                                | -2.5144            | -1.3504            |
| Ctnnb1  | Catenin (cadherin associated protein), beta 1                                                 | -1.0586            | -1.2366            |
| Ecm1    | Extracellular matrix protein 1                                                                | -1.2279            | 1.0641             |
| Emilin1 | Elastin microfibril interfacier 1                                                             | -1.0601            | -1.1411            |
| Entpd1  | Ectonucleoside triphosphate diphosphohydrolase 1                                              | -1.3033            | -1.6261            |
| Fbln1   | Fibulin 1                                                                                     | -1.173             | -1.3485            |
| Fn1     | Fibronectin 1                                                                                 | 1.5239             | 1.3118             |
| Hapln1  | Hyaluronan and proteoglycan link protein 1                                                    | 1.3945             | -2.8194            |
| Hc      | Hemolytic complement                                                                          | -1.7804            | -2.0454            |
| Icam1   | Intercellular adhesion molecule 1                                                             | 1.5229             | 1.3137             |
| Itga2   | Integrin alpha 2                                                                              | -1.4144            | -1.7476            |
| Itga3   | Integrin alpha 3                                                                              | -2.1919            | -1.6904            |
| Itga4   | Integrin alpha 4                                                                              | -2.0437            | -1.357             |
| Itga5   | Integrin alpha 5 (fibronectin receptor alpha)                                                 | 1.1915             | -1.1522            |
| Itgae   | Integrin alpha E, epithelial-associated                                                       | -2.221             | -1.1797            |
| Itgal   | Integrin alpha L                                                                              | -2.5144            | -1.3589            |
| Itgam   | Integrin alpha M                                                                              | -1.0304            | 2.1623             |
| Itgav   | Integrin alpha V                                                                              | -1.8637            | -1.1978            |
| Itgax   | Integrin alpha X                                                                              | 1.0724             | 2.3369             |
| Itgb1   | Integrin beta 1 (fibronectin receptor beta)                                                   | -1.1617            | -1.4463            |
| Itgb2   | Integrin beta 2                                                                               | 1.5624             | 2.3418             |
| Itgb3   | Integrin beta 3                                                                               | -1.6315            | -1.7332            |
| Itgb4   | Integrin beta 4                                                                               | -1.4076            | -1.533             |
| Lama1   | Laminin, alpha 1                                                                              | 1.5624             | 1.7131             |
| Lama2   | Laminin, alpha 2                                                                              | -1.3863            | 1.0752             |
| Lama3   | Laminin, alpha 3                                                                              | -1.0513            | -1.5151            |
| Lamb2   | Laminin, beta 2                                                                               | -1.8741            | -1.3208            |
| Lamb3   | Laminin, beta 3                                                                               | -1.3969            | 1.2645             |
| Lamc1   | Laminin, gamma 1                                                                              | 1.0881             | -1.6081            |
| Mmp10   | Matrix metallopeptidase 10                                                                    | -8.096             | 5.0616             |
| Mmp11   | Matrix metallopeptidase 11                                                                    | -2.4321            | -1.2679            |
| Mmp12   | Matrix metallopeptidase 12                                                                    | 6.3107             | 12.3514            |
| Mmp13   | Matrix metallopeptidase 13                                                                    | -1.1465            | 3.4982             |
| Mmp14   | Matrix metallopeptidase 14 (membrane-inserted)                                                | -2.7706            | -1.4166            |
| Mmp15   | Matrix metallopeptidase 15                                                                    | -1.1836            | 1.2231             |
| Mmp1a   | Matrix metallopeptidase 1a (interstitial collagenase)                                         | -1.1552            | 1.0985             |
| Mmp2    | Matrix metallopeptidase 2                                                                     | -1.8279            | -1.0558            |
| Mmp3    | Matrix metallopeptidase 3                                                                     | -4.2257            | -3.2839            |
| Mmp7    | Matrix metallopeptidase 7                                                                     | -5.5067            | 1.5611             |
| Mmp8    | Matrix metallopeptidase 8                                                                     | 2.4654             | 2.6273             |
| Mmp9    | Matrix metallopeptidase 9                                                                     | -1.5683            | -1.0863            |
| Ncam1   | Neural cell adhesion molecule 1                                                               | -1.8963            | -2.1015            |
| Ncam2   | Neural cell adhesion molecule 2                                                               | -5.3044            | -1.5491            |
| Pecam1  | Platelet/endothelial cell adhesion molecule 1                                                 | -1.3824            | -1.7501            |
| Postn   | Periostin, osteoblast specific factor                                                         | 1.028              | -1.7893            |
| Sele    | Selectin, endothelial cell                                                                    | -2.7419            | -1.4353            |
| Sell    | Selectin, lymphocyte                                                                          | -1.565             | -1.2145            |
| Selp    | Selectin, platelet                                                                            | 1.753              | -1.1618            |
| Sgce    | Sarcoglycan, epsilon                                                                          | 1.7062             | -1.6104            |
| Sparc   | Secreted acidic cysteine rich glycoprotein                                                    | 1.111              | -1.5729            |
| Spock1  | Sparc/osteonectin, cwcv and kazal-like domains proteoglycan 1                                 | -6.4183            | -1.4009            |
| Spp1    | Secreted phosphoprotein 1                                                                     | 3.5945             | 6.8905             |

|       |                                          |         |         |
|-------|------------------------------------------|---------|---------|
| Syt1  | Synaptotagmin I                          | -1.536  | 1.6662  |
| Tgfb1 | Transforming growth factor, beta induced | 1.1589  | 1.5687  |
| Thbs1 | Thrombospondin 1                         | -1.7742 | -1.9084 |
| Thbs2 | Thrombospondin 2                         | -1.762  | -1.6834 |
| Thbs3 | Thrombospondin 3                         | -1.5159 | -1.4176 |
| Timp1 | Tissue inhibitor of metalloproteinase 1  | -1.1869 | 2.012   |
| Timp2 | Tissue inhibitor of metalloproteinase 2  | 1.0843  | -1.4829 |
| Timp3 | Tissue inhibitor of metalloproteinase 3  | -1.518  | -1.7881 |
| Tnc   | Tenascin C                               | -1.8496 | 1.0214  |
| Vcam1 | Vascular cell adhesion molecule 1        | -1.2747 | -1.2349 |
| Vcan  | Versican                                 | -1.9335 | -1.6148 |
| Vtn   | Vitronectin                              | -1.6832 | -2.1308 |

163



164 **Supplementary Table 2. Human subject characteristics.**

|                                  | <b>Healthy</b> | <b>COPD</b> | <b>smoker</b> | <b>p-value</b> |
|----------------------------------|----------------|-------------|---------------|----------------|
| <b>Number</b>                    | 8              | 9           | 5             | NA             |
| <b>Sex (% female)</b>            | 50%            | 55%         | 80%           | P=0.6          |
| <b>Mean Age (SD)</b>             | 60 (8)         | 65 (15)     | 55 (11)       | P=0.71         |
| <b>Mean FEV<sub>1</sub> (SD)</b> | 104.3 (13.62)  | 46 (10.55)  | 92.3 (9.5)    | P < 0.001      |
| <b>Cigarette (Pack/year; SD)</b> | 0              | 53 (34.8)   | 32 (9.4)      | P=0.05         |
| <b>Years abstinent (SD)</b>      | 0              | 9.6 (1.2)   | 0             | NA             |
| <b>ICS (present treated)</b>     | 0              | 100%        | 0             | NA             |

165

166 FEV<sub>1</sub> refers to the forced expiratory volume in 1s expressed as a percentage of the  
 167 predicated value.

168 The statistical analysis used for this table is ANOVA for multiple groups.

169 NA = Not applicable.

170 **Supplementary Table 3. Primers used for qPCR analysis.**

| <b>Gene</b>   | <b>Forward primer 5' to 3'</b> | <b>Reverse primer 5' to 3'</b> |
|---------------|--------------------------------|--------------------------------|
| <i>Col1a1</i> | CTTCACCTACAGCACCCCTTG TG       | TGACTGTCTTGCCCCAAGTTC          |
| <i>Fbln1c</i> | AGAACTATCGCCGCTCCGCA           | CCACCGCTGGCACTTGGATG           |
| <i>Fbln1d</i> | GCTATGAGGACGGCATGACT           | GGAAACTACGCCTCCCAACA           |
| <i>Smad2</i>  | AATACGGTAGATCAGTGGGACA         | CAGTTTTCGATTGCCTTGAGC          |
| <i>Smad3</i>  | GTTCTCCAAACCTCTCCCCG           | TGTGAGGCGTGGAATGTCTC           |
| <i>Smad4</i>  | AGCCGTCCTTACCCACTGAA           | GGTGGTAGTGCTGTTATGATGGT        |
| <i>MMP1</i>   | GTCTTCTGGCACACGCTTTT           | GGGCAGCAACAATAAACAA            |
| <i>MMP3</i>   | ACATGGAGACTTTGTCCCTTTTG        | TTGGCTGAGTGGTAGAGTCCC          |
| <i>MMP7</i>   | TTTGCTGCCACCCATGAAT            | ACATCACAGTACCGGGAACAGA         |
| <i>MMP8</i>   | GATTCAGAAGAAACGTGGACTCAA       | CATCAAGGCACCAGGATCAGT          |
| <i>MMP12</i>  | GCTTGAGTTTTGATGGTGTAC          | GAAGTAATGTTGGTGGCTGGGA         |
| <i>MMP13</i>  | CCTTCTGGTCTTCTGGCACAC          | GGCTGGGTCACACTTCTCTGG          |
| <i>HPRT</i>   | AGGCCAGACTTTGTTGGATTTGAA       | CAACTTGCGCTCATCTTAGGCTTT       |

171
